# Supplementary material
Source: Royal Society of Chemistry journal article supplement (doi:10.1039/d5ma01523e)
Supplement: d5ma01523e1.pdf [file d5ma01523e1.pdf]

## Phosphorous Acid Mediated Novel Synthesis of $\text{MnPO}_4 \cdot \text{H}_2\text{O}$ and $\text{Mn}_2\text{P}_2\text{O}_7$ with Unique Flower-Like Morphology: A New Approach to Manganese Phosphates Supercapacitors

Prakash Bobde<sup>a,b</sup>, Kajal Uphade<sup>c</sup>, Sharath Kandambeth<sup>c</sup>, Shikha Wadhwa<sup>d</sup>, Ranjit Kumar<sup>e\*</sup>

<sup>a</sup>Techknowgreen Research Laboratory-9, Building G A-4, 3rd Floor, Waters Square, New DP Road, Pimpri-Chinchwad, Pune-411027, India

<sup>b</sup>Department of Research & Development, UPES University, Energy Acres Building, Bidholi, Dehradun-248007, Uttarakhand, India

<sup>c</sup>Department of Chemistry, Shiv Nadar Institution of Eminence, Delhi-NCR-201314, India

<sup>d</sup>Applied Science Cluster, School of Engineering, UPES University, Energy Acres Building, Bidholi, Dehradun-248007, Uttarakhand, India

<sup>e\*</sup>Center for Advanced Materials, Department of Chemical Engineering, Shiv Nadar Institution of Eminence, Delhi-NCR-201314, India

\* Corresponding author

Email: [ranjit.kumar@snu.edu.in](mailto:ranjit.kumar@snu.edu.in)

### Supporting Information

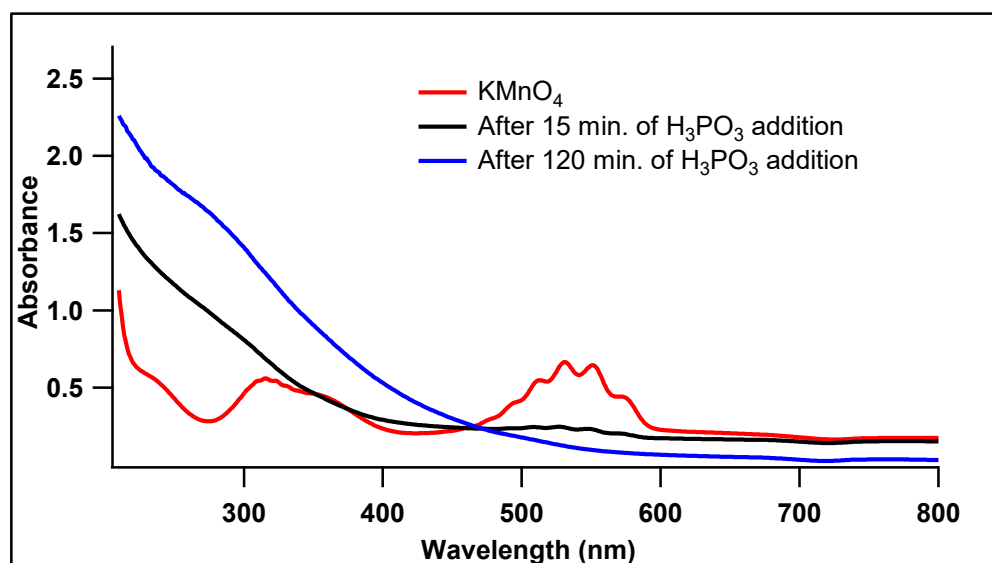

Fig. S1. UV-vis spectra to monitor the progress of the reaction between  $\text{KMnO}_4$  and  $\text{H}_3\text{PO}_3$ .

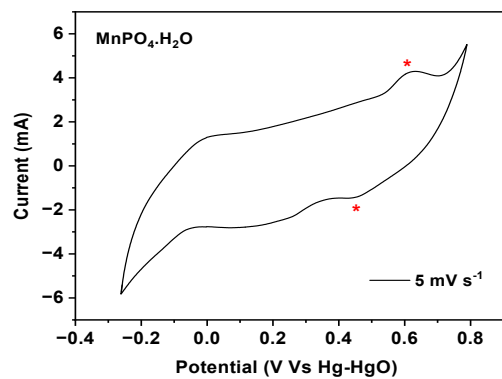

**Fig. S2.** Cyclic voltammogram of  $\text{MnPO}_4$  at a lower scan rate of  $5 \text{ mV s}^{-1}$

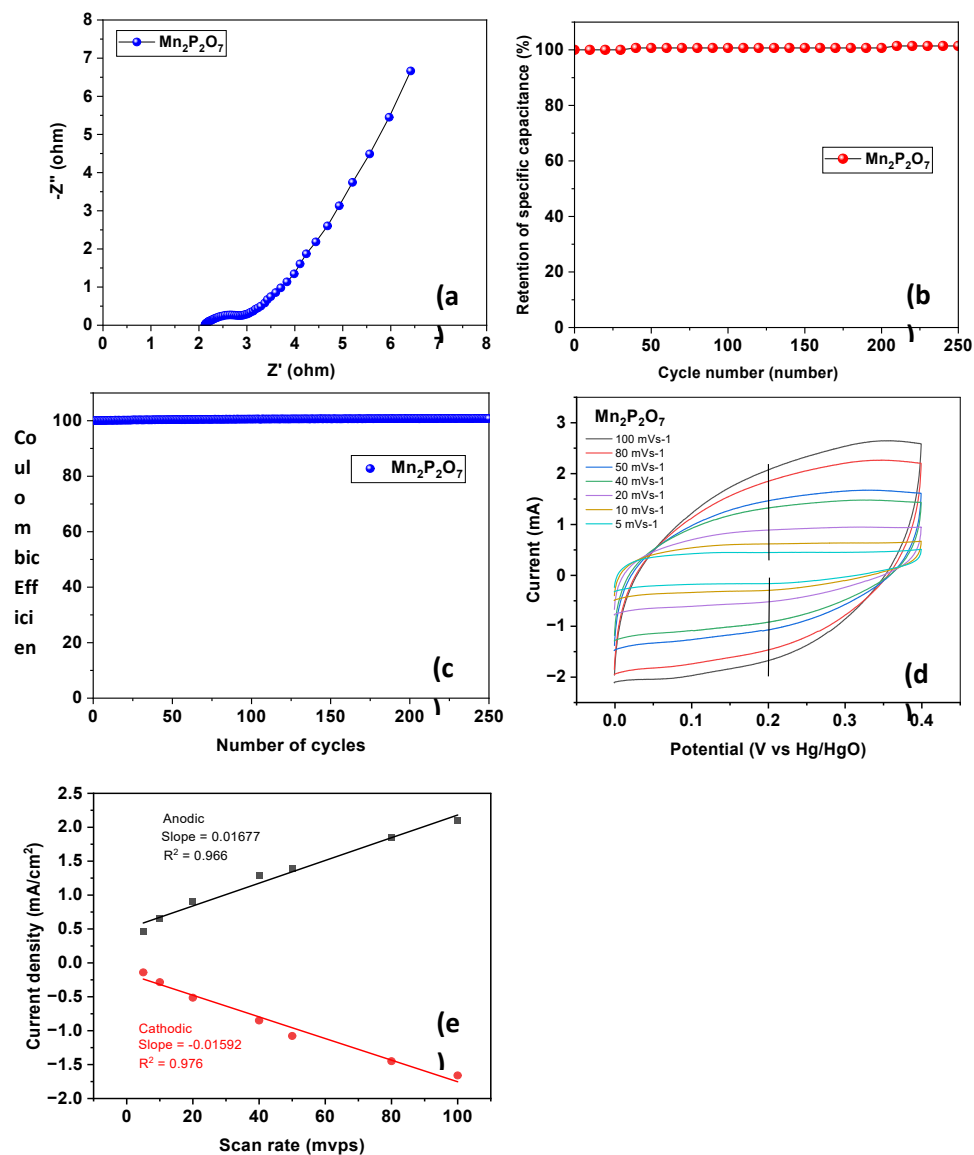

**Fig. S3.** (a) EIS (b) Specific capacitance (c) Coulombic efficiency (d) CV (e) linear plot of capacitive current density vs scan rate of  $\text{Mn}_2\text{P}_2\text{O}_7$
